# Supplementary material for: Chitosan-Based Hydrogel for the Dual Delivery of Antimicrobial Agents Against Bacterial Methicillin-Resistant Staphylococcus aureus Biofilm-Infected Wounds
Source: PubMed Central journal article supplement — ACS Omega. 2021 Aug 19;6(34):21994–2010. doi: 10.1021/acsomega.1c02547 (PMC8412894; doi:10.1021/acsomega.1c02547), 2021-08-19
Supplement: ao1c02547_si_001.pdf [file ao1c02547_si_001.pdf]

**A chitosan-based hydrogel for the dual delivery of antimicrobial agents against a bacterial methicillin-resistant *Staphylococcus aureus* (MRSA) biofilm infected wound**

**Victoria O. Fasiku<sup>1</sup>, Calvin A. Omolo<sup>1,2\*</sup>, Nikita Devnarain<sup>1</sup>, Usri H. Ibrahim<sup>1</sup>, Sanjeev Rambharose<sup>3</sup>, Mbuso Faya<sup>1</sup>, Chunderika Mocktar<sup>1</sup>, Sanil D. Singh<sup>4</sup> and Thirumala Govender<sup>1\*</sup>**

<sup>1</sup>Discipline of Pharmaceutical Sciences, College of Health Sciences, University of KwaZulu-Natal, Private Bag X54001, Durban, South Africa

<sup>2</sup>United States International University-Africa, School of Pharmacy and Health Sciences, Department of Pharmaceutics, P. O. Box 14634-00800, Nairobi, Kenya.

<sup>3</sup>Department of Physiological Sciences, Faculty of Science, Stellenbosch University, Private Bag X1 Matieland, Stellenbosch 7602, South Africa

<sup>4</sup>Biomedical research Unit, University of KwaZulu-Natal, Private Bag X54001, Durban, South Africa.

Corresponding Author: [comolo@usiu.ac.ke](mailto:comolo@usiu.ac.ke), [govenderth@ukzn.ac.ke](mailto:govenderth@ukzn.ac.ke).

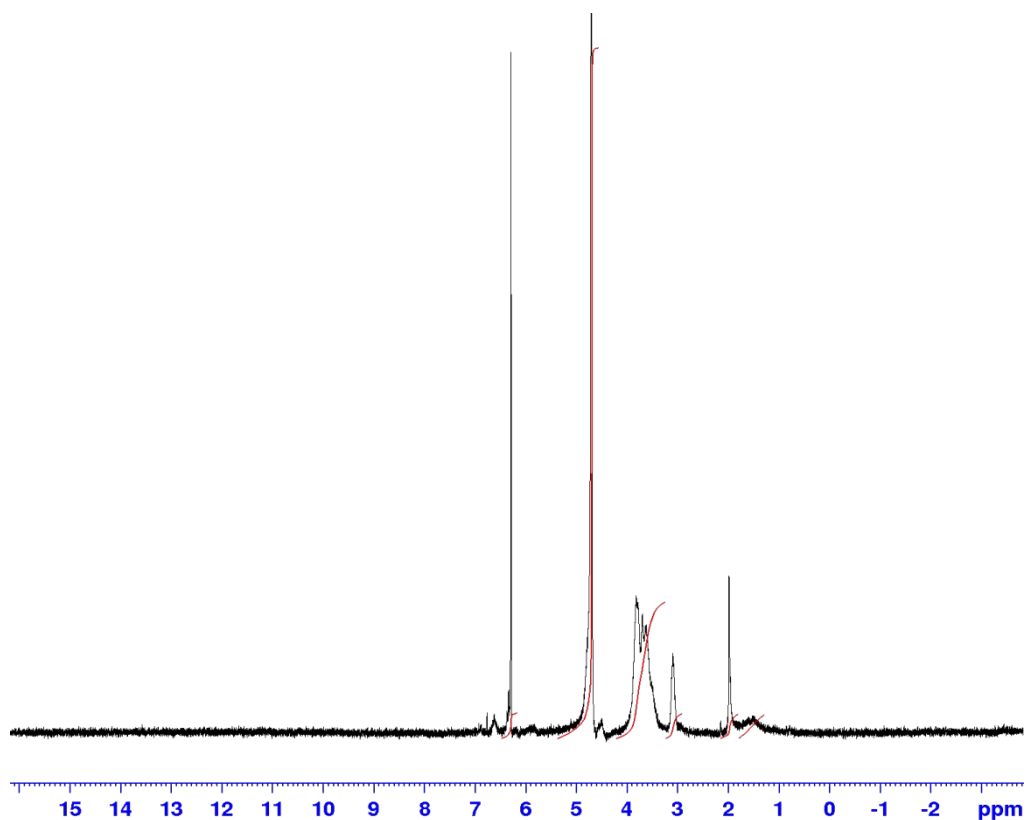

Figure S1:  $^1\text{H}$  NMR spectrum of maleic anhydride chitosan

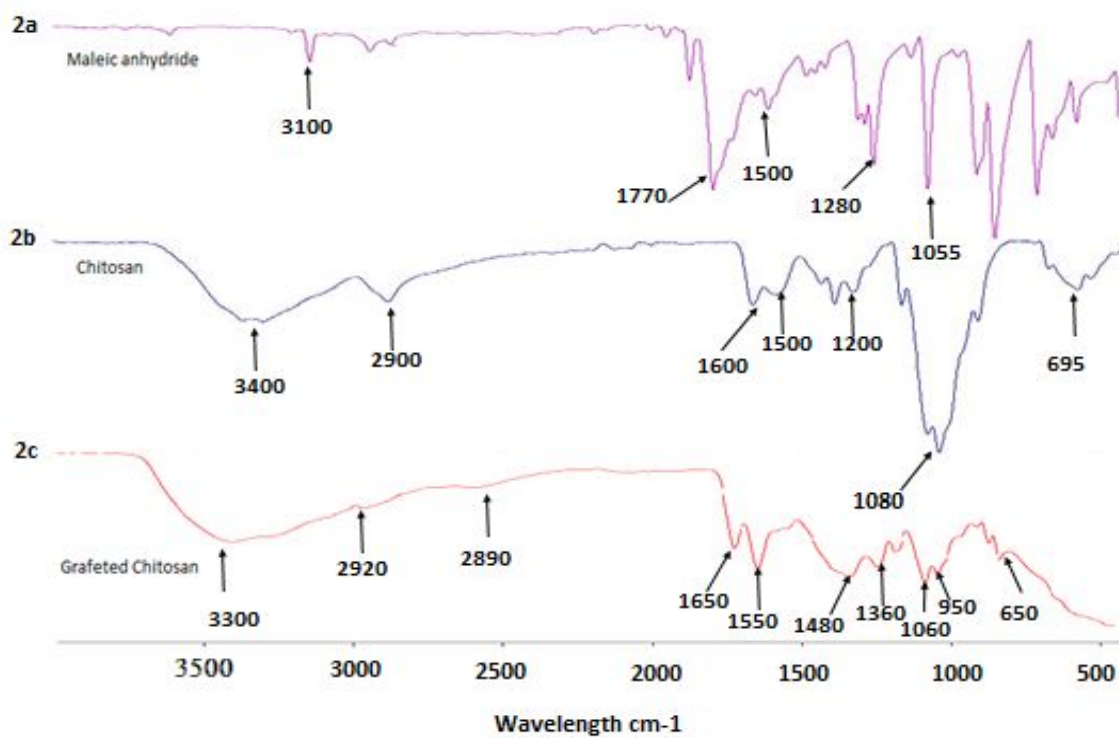

Figure S2: FTIR images of (2a) maleic anhydride, (2b) chitosan and (2c) grafted chitosan.

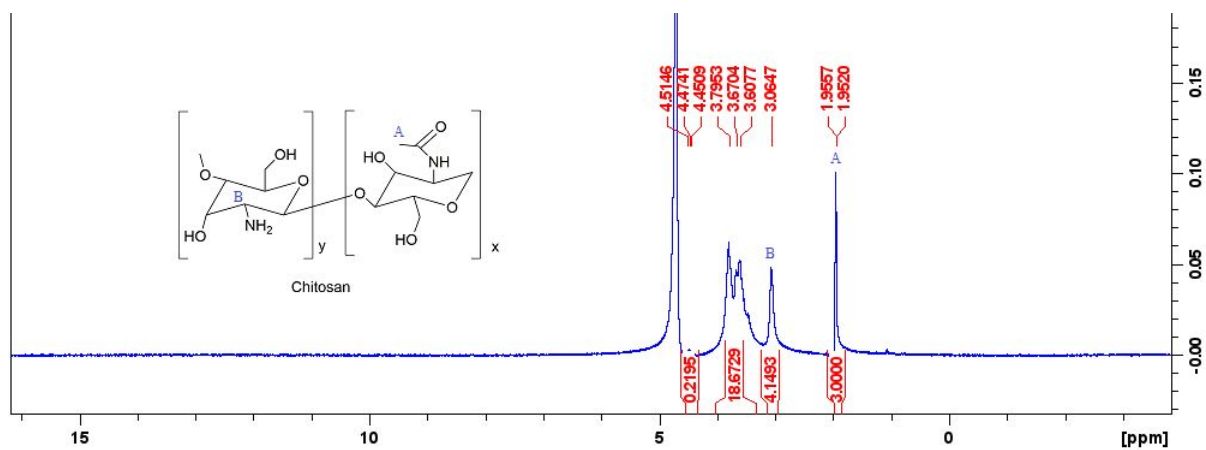

Figure S3: Proton NMR intergradation of the pristine chitosan.

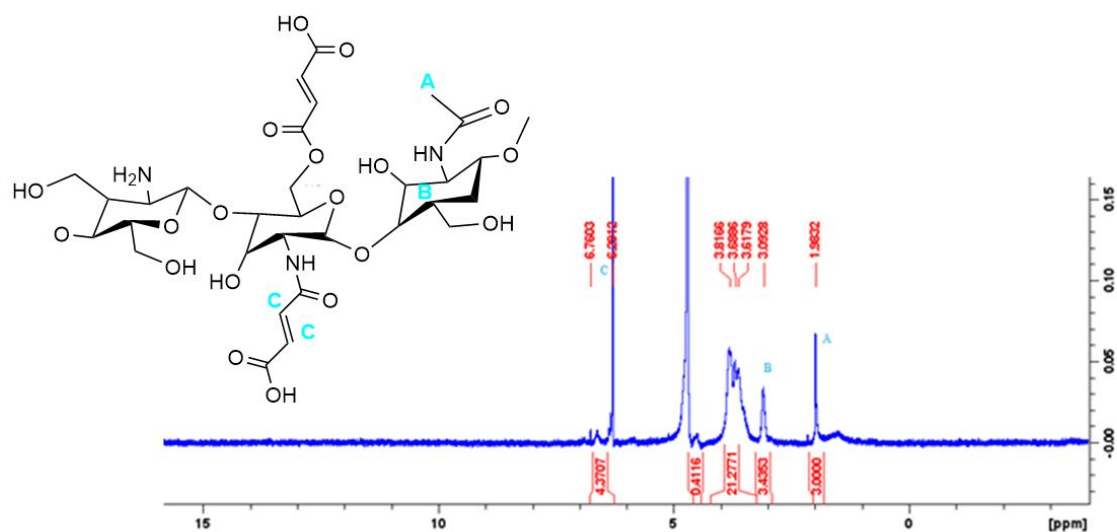

Figure S4: Proton NMR intergradation of the grafted chitosan.

Table S1: Swelling ratio and swelling capacity of hydrogel in pH 7.4 at body and room temperatures respectively.

| <b>pH 7.4</b>           |                       |                              |                         |                              |
|-------------------------|-----------------------|------------------------------|-------------------------|------------------------------|
| <b>Body temperature</b> |                       |                              | <b>Room temperature</b> |                              |
| <b>Time (hrs)</b>       | <b>Swelling ratio</b> | <b>Swelling capacity (%)</b> | <b>Swelling ratio</b>   | <b>Swelling capacity (%)</b> |
| 0.5                     | 2.78                  | 278.5263158                  | 2.04                    | 204.6315789                  |
| 1                       | 4.36                  | 436.5263158                  | 3.50                    | 350.6315789                  |
| 2                       | 7.54                  | 754.1052632                  | 4.47                    | 447.0526316                  |
| 3                       | 8.60                  | 860.7368421                  | 5.53                    | 553.0526316                  |
| 4                       | 10.05                 | 1005.894737                  | 6.05                    | 605.1578947                  |
| 5                       | 10.51                 | 1051.052632                  | 6.80                    | 680.1052632                  |
| 6                       | 12.33                 | 1233.684211                  | 8.38                    | 838.2105263                  |
| 12                      | 14.43                 | 1443.368421                  | 9.64                    | 964.8421053                  |
| 24                      | 26.94                 | 2694.736842                  | 15.84                   | 1584.210526                  |

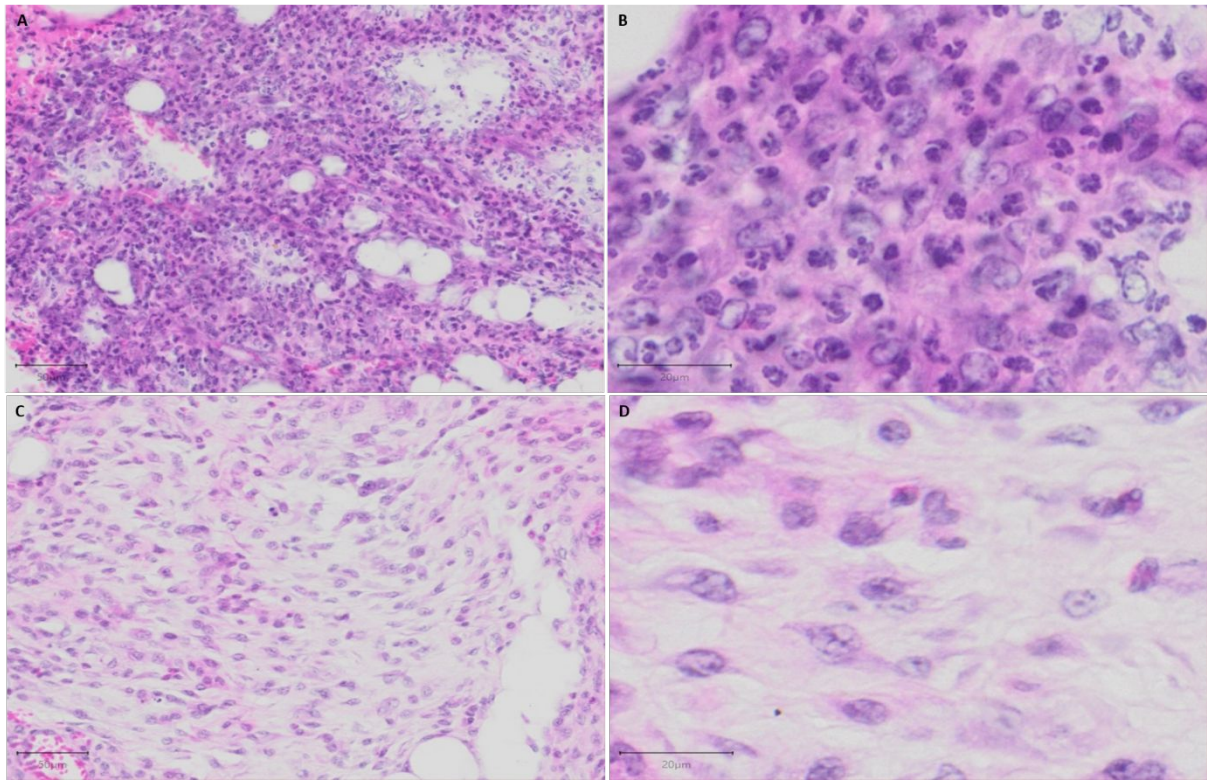

Figure S5: Histological analysis of H&E stained sections of untreated (A – 10X, B – 40X), HP (C – 10X, D – 40X) displaying cellular infiltration

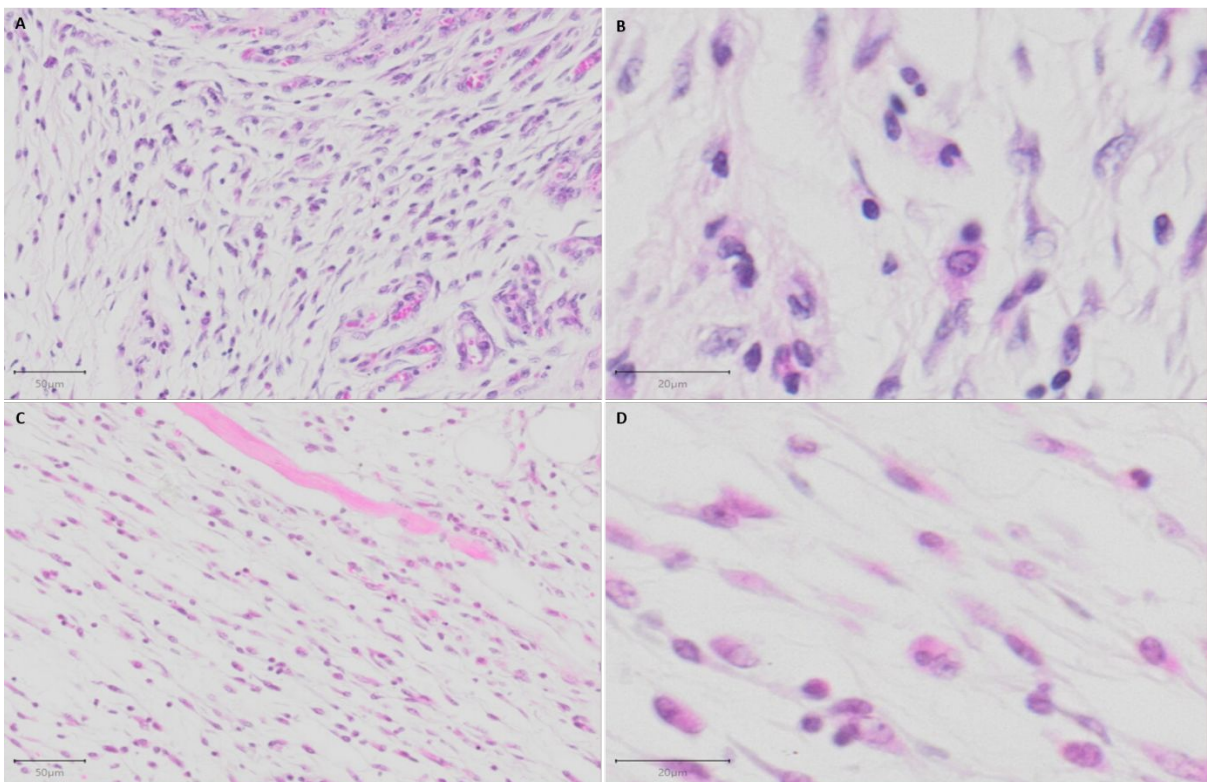

Figure S6: Histological analysis of H&E stained sections of CS-HP (A – 10X, B – 40X), CS-HP-P (C – 10X, D – 40X) displaying cellular infiltration.
